# Supplementary material
Source: ML conference proceedings conference paper supplement (https://openreview.net/forum?id=qH6pzxPZ0d)

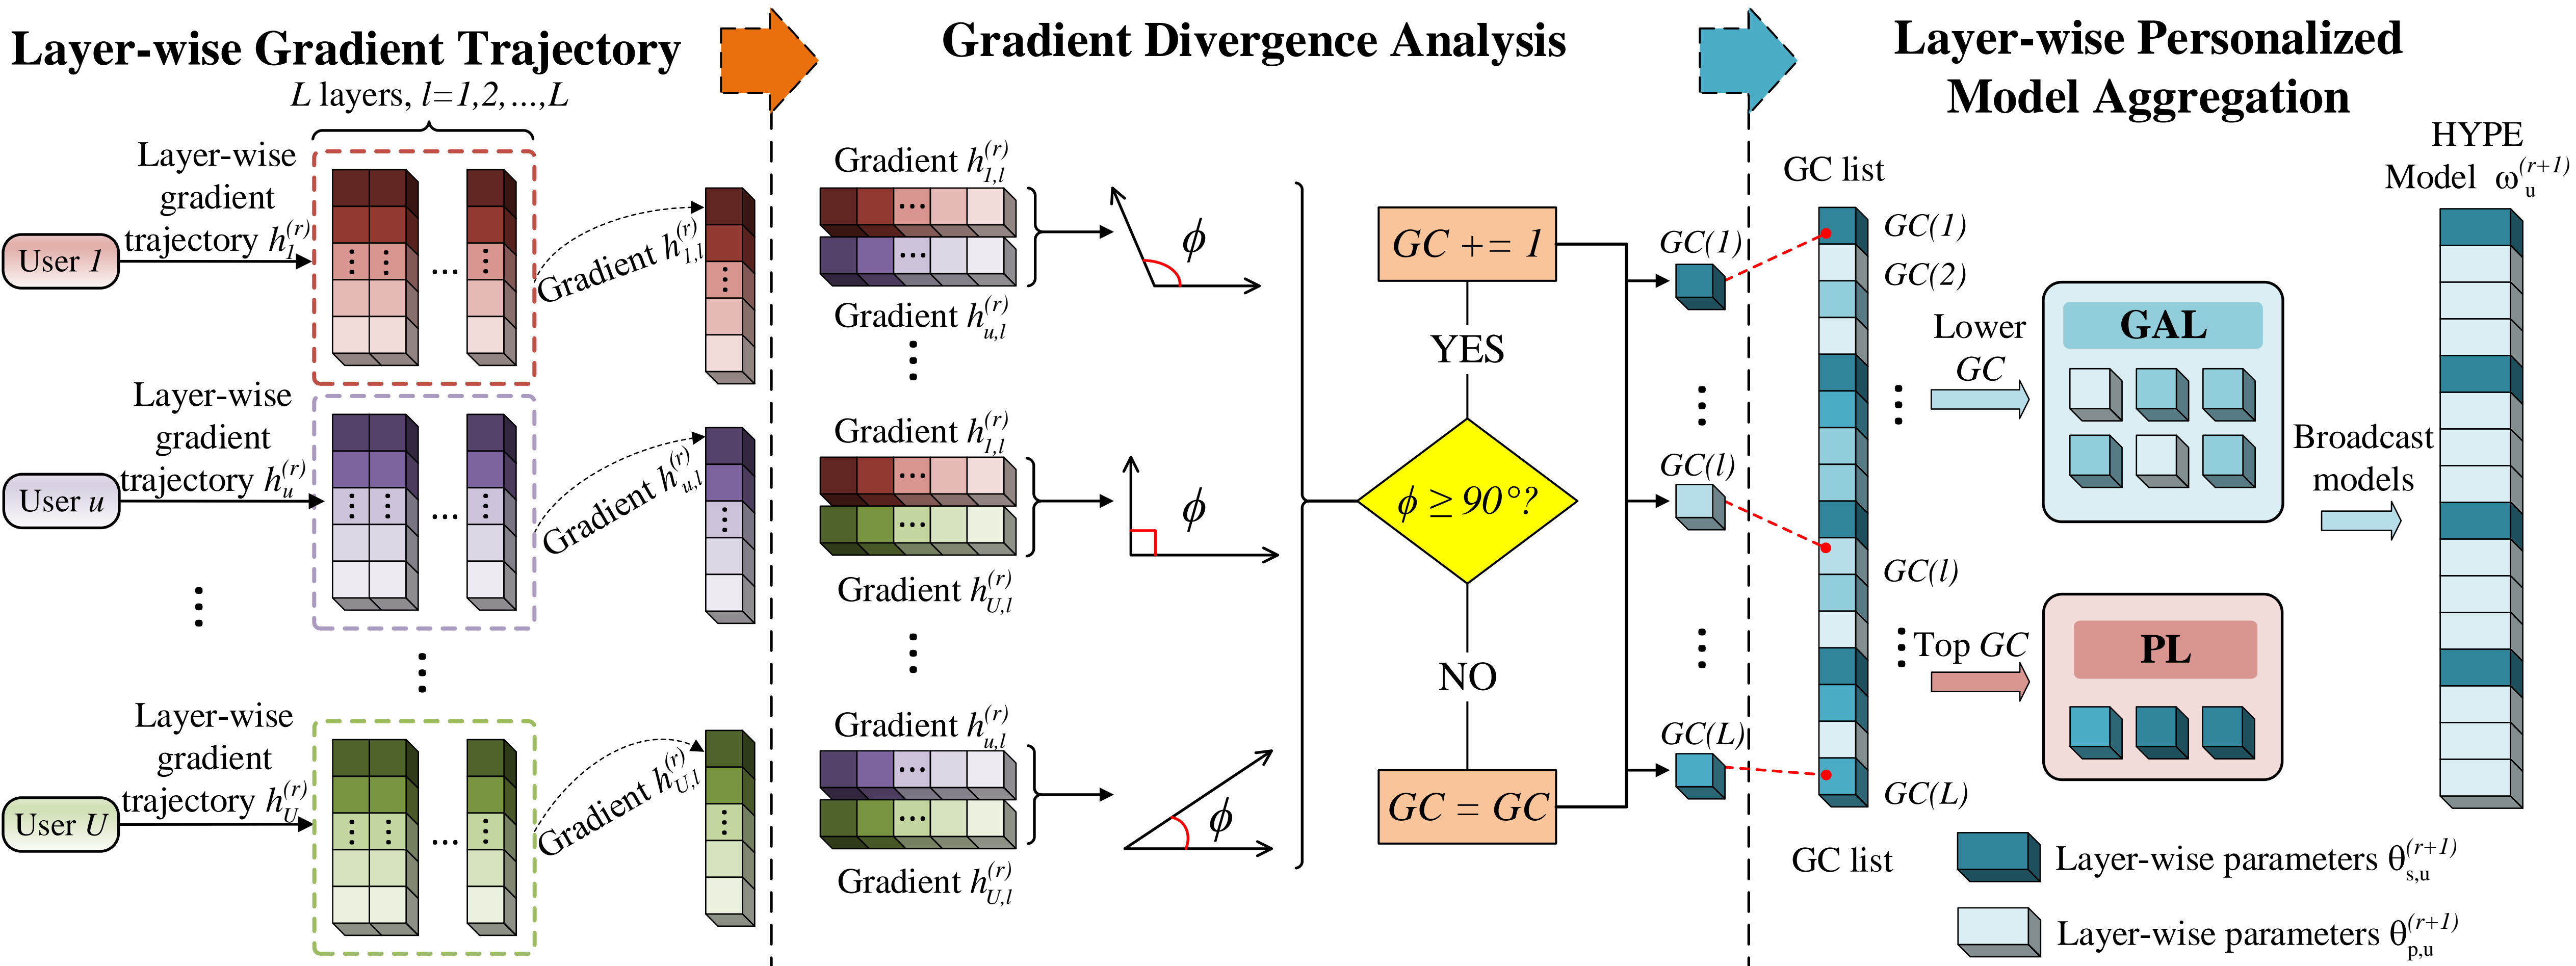

Supplement: supplementary_material [file attachment]
